# Supplementary material for: Feasibility on Point-of-Care Testing and Knowledge, Attitudes, and Satisfaction of Patients on Chronic Hepatitis B in Primary Healthcare: A Pilot Study in Hong Kong
Source: Research Square preprint supplement (doi:10.21203/rs.3.rs-7442621/v1), 2025-10-08
Supplement: Supplementary file 1 [file ff8a2280d26797db5ab299e2.pdf]

## Supplementary Materials

### Table of Content

| Contents                                                                                                                                                                 | Page |
|--------------------------------------------------------------------------------------------------------------------------------------------------------------------------|------|
| Supplementary Table S1. Self-Reported Reasons for Receiving HBV Vaccination Among Vaccinated Participants (n = 33)                                                       | 2    |
| Supplementary Table S2. Self-Reported Time Since Receiving HBV Vaccination Among Vaccinated Participants (n = 33)                                                        | 3    |
| Supplementary Table S3. Self-Reported Reasons for Not Receiving or Being Unsure About HBV Vaccination (n = 45)                                                           | 4    |
| Supplementary Table S4. Summary of Participant Responses to CHB-Related Knowledge Questions, Including Disease Transmission, Disease Management, and Disease Progression | 5    |
| Supplementary Table S5. Multiple Linear Regression Predicting CHB Disease Transmission Knowledge Score                                                                   | 6    |
| Supplementary Table S6. Multiple Linear Regression Predicting CHB Disease Progression Knowledge Score                                                                    | 7    |
| Supplementary File 1. Study Questionnaire (separate file attached)                                                                                                       | 8    |

Supplementary Table S1. Self-Reported Reasons for Receiving HBV Vaccination Among Vaccinated Participants (n = 33\*)

| <b>Reason</b>                                                    | <b>n (%)</b> |
|------------------------------------------------------------------|--------------|
| Received as part of the childhood, or school vaccination program | 22 (66.7)    |
| Recommended by attending doctor                                  | 7 (21.2)     |
| Recommended by family members                                    | 4 (12.1)     |
| Recommended by friends                                           | 2 (6.1)      |
| Attended a health talk or event                                  | 1 (3.0)      |
| To protect oneself from HBV                                      | 1 (3.0)      |

**\*Note:** Multiple responses allowed; percentages do not total 100%.

Supplementary Table S2. Self-Reported Time Since Receiving HBV Vaccination Among Vaccinated Participants (n = 33)

| <b>Time Since Vaccination</b> | <b>n (%)</b> |
|-------------------------------|--------------|
| Within 1 year                 | 0 (0.0)      |
| 1–5 years ago                 | 3 (9.1)      |
| 5–10 years ago                | 4 (12.1)     |
| 10–20 years ago               | 11 (33.3)    |
| More than 20 years ago        | 15 (45.5)    |

Supplementary Table S3. Self-Reported Reasons for Not Receiving or Being Unsure About HBV Vaccination (n = 45<sup>#</sup>)

| Reason                                                     | n (%)     |
|------------------------------------------------------------|-----------|
| Did not know where to get vaccinated                       | 16 (36.4) |
| Did not understand the benefits of vaccination             | 11 (25.0) |
| Felt healthy and did not believe vaccination was necessary | 10 (22.7) |
| Believed there were no risk factors for HBV                | 10 (22.7) |
| Concerned about vaccine side effects                       | 5 (11.4)  |
| Could not afford the vaccine                               | 2 (4.5)   |
| Doctor advised that vaccination was not necessary          | 1 (1.5)   |
| Did not have time to get vaccinated                        | 0 (0.0)   |

**#Note:** Multiple responses allowed; percentages do not total 100%.

Supplementary Table S4. Summary of Participant Responses to CHB-Related Knowledge Questions, Including Disease Transmission, Disease Management, and Disease Progression

| Questions                                                                                       | Answer | % of Correct Reponses |
|-------------------------------------------------------------------------------------------------|--------|-----------------------|
| <b>Disease Transmission Domain</b>                                                              |        |                       |
| HBV can be transmitted through sexual contact.                                                  | True   | 55.0%                 |
| HBV can be transmitted from mother to child during delivery.                                    | True   | 84.4%                 |
| HBV can be transmitted through genetic inheritance.                                             | False  | 46.8%                 |
| HBV can be transmitted through blood transfusion.                                               | True   | 83.5%                 |
| HBV can be transmitted through sharing needles.                                                 | True   | 88.1%                 |
| HBV can be transmitted through sharing razors or toothbrushes.                                  | True   | 66.8%                 |
| HBV can be transmitted through sharing food or utensils (such as bowls, chopsticks, or spoons). | False  | 55.0%                 |
| HBV can be transmitted through shaking hands.                                                   | False  | 97.2%                 |
| HBV can be transmitted by eating raw shellfish.                                                 | False  | 27.5%                 |
| <b>Average of Disease Transmission Domain</b>                                                   |        | 67.4%                 |
| <b>Disease Management Domain</b>                                                                |        |                       |
| CHB can be prevented.                                                                           | True   | 91.7%                 |
| CHB is curable.                                                                                 | False  | 41.3%                 |
| HBV can be killed through handwashing.                                                          | False  | 74.3%                 |
| HBV vaccine exists.                                                                             | True   | 94.5%                 |
| <b>Average of Disease Management Domain</b>                                                     |        | 75.5%                 |
| <b>Disease Progression Domain</b>                                                               |        |                       |
| You may be infected with CHB without showing symptoms.                                          | True   | 76.1%                 |
| CHB can cause liver cirrhosis (scarring caused by liver damage).                                | True   | 98.2%                 |
| CHB can cause liver cancer.                                                                     | True   | 91.7%                 |
| <b>Average of Disease Progression Domain</b>                                                    |        | 88.7%                 |
| <b>Overall Average</b>                                                                          |        | 73.4%                 |

Supplementary Table S5. Multiple Linear Regression Predicting CHB Disease Transmission Knowledge Score

| Predictor                      | $\beta$ | 95% CI        | p-value   |
|--------------------------------|---------|---------------|-----------|
| (Intercept)                    | 5.68    | (2.34, 9.02)  | 0.001 *** |
| Age                            | -0.011  | (-0.05, 0.03) | 0.576     |
| Sex                            | 0.17    | (-0.40, 0.74) | 0.572     |
| Lives alone                    | 0.85    | (-0.23, 1.94) | 0.123     |
| Married                        | 0.19    | (-0.69, 1.07) | 0.675     |
| Education level                | 0.10    | (-0.33, 0.53) | 0.640     |
| Employed                       | -0.05   | (-0.70, 0.59) | 0.869     |
| Born in Hong Kong              | 0.65    | (-0.08, 1.38) | 0.081 †   |
| Chronic disease                | 0.20    | (-0.53, 0.93) | 0.589     |
| Knows someone with CHB         | 0.53    | (-0.08, 1.14) | 0.095 †   |
| Insured                        | -0.28   | (-0.89, 0.28) | 0.355     |
| Has family doctor              | -0.52   | (-1.09, 0.05) | 0.071 †   |
| Recent doctor visit (< 1 year) | -0.06   | (-0.85, 0.74) | 0.885     |
| Doctor discussed HBV testing   | 0.81    | (-0.28, 1.90) | 0.143     |
| Vaccinated                     | 0.58    | (-0.09, 1.25) | 0.083 †   |
| Stigma present ( $\geq 1$ )    | 0.06    | (-0.53, 0.65) | 0.843     |

**Model summary:**  $R^2 = 0.215$ , Adjusted  $R^2 = 0.089$ ,  $F(15, 93) = 1.70$ ,  $p = 0.064$

**Note.**  $\beta$  represents the unstandardized regression coefficient. CI = confidence interval. A positive  $\beta$  indicates a higher CHB transmission knowledge score relative to the reference category. Reference categories: female (sex), not married (marital status), not employed (employment), not born in Hong Kong (birthplace), no chronic disease, not insured, no family doctor, no recent doctor visit (> 1 year), did not discuss hepatitis B testing with doctor, not vaccinated, does not live alone, does not know someone with CHB, and no stigma (score = 0).  $p < 0.05$  (\*) was considered statistically significant.  $p < 0.10$  (†) was considered borderline significance and interpreted as a trend.

Supplementary Table S6. Multiple Linear Regression Predicting CHB Disease Progression Knowledge Score

| Predictor                      | $\beta$ | 95% CI        | p-value |
|--------------------------------|---------|---------------|---------|
| (Intercept)                    | 1.76    | (0.21, 3.31)  | 0.026 * |
| Age                            | 0.008   | (-0.01, 0.03) | 0.375   |
| Sex                            | -0.10   | (-0.38, 0.18) | 0.471   |
| Lives alone                    | -0.06   | (-0.55, 0.42) | 0.807   |
| Married                        | 0.02    | (-0.48, 0.52) | 0.914   |
| Education level                | 0.09    | (-0.10, 0.29) | 0.347   |
| Employed                       | 0.13    | (-0.16, 0.43) | 0.382   |
| Born in Hong Kong              | 0.05    | (-0.27, 0.37) | 0.761   |
| Chronic disease                | -0.11   | (-0.45, 0.23) | 0.525   |
| Knows someone with CHB         | 0.10    | (-0.18, 0.38) | 0.492   |
| Insured                        | -0.10   | (-0.37, 0.17) | 0.462   |
| Has family doctor              | -0.08   | (-0.34, 0.19) | 0.559   |
| Recent doctor visit (< 1 year) | 0.16    | (-0.21, 0.52) | 0.400   |
| Doctor discussed HBV testing   | 0.16    | (-0.33, 0.66) | 0.516   |
| Vaccinated                     | -0.04   | (-0.34, 0.26) | 0.804   |
| Stigma present ( $\geq 1$ )    | -0.04   | (-0.32, 0.24) | 0.784   |

**Model summary:**  $R^2 = 0.051$ , Adjusted  $R^2 = -0.102$ ,  $F(15, 93) = 0.34$ ,  $p = 0.990$

**Note.**  $\beta$  represents the unstandardized regression coefficient. CI = confidence interval. A positive  $\beta$  indicates a higher CHB progression knowledge score relative to the reference category. Reference categories: female (sex), not married (marital status), not employed (employment), not born in Hong Kong (birthplace), no chronic disease, not insured, no family doctor, no recent doctor visit (> 1 year), did not discuss hepatitis B testing with doctor, not vaccinated, does not live alone, does not know someone with CHB, and no stigma (score = 0).  $p < 0.05$  (\*) was considered statistically significant.  $p < 0.10$  (†) was considered borderline significance and interpreted as a trend.

Supplementary File 1. Study Questionnaire (separate file attached)



This is an English translation of the original Chinese questionnaire administered to participants.  
Provided for reference only; not used for data collection.

## ***Role of Point-of-care Screening of Chronic Hepatitis B in Primary HealthCare Setting in Hong Kong – A Pilot Feasibility Study***

### **Questionnaire**

**Date of Completion:** \_\_\_\_\_ (dd/mm/yyyy)    **Case ID/Questionnaire ID:** \_\_\_\_\_

Thank you for participating in this questionnaire! We sincerely invite you to share your knowledge and views on chronic hepatitis B. Your opinions are very important to us. Please answer as fully as possible. All your information will be kept confidential and used only for academic research.

#### **Part 1: Demographic Information**

This section collects participants' basic background information.

1. Name : \_\_\_\_\_
2. Age : \_\_\_\_\_
3. Gender : Male / Female
4. Who do you currently live with?
  - ☐ Alone
  - ☐ With children
  - ☐ With spouse/partner
  - ☐ Other : \_\_\_\_\_
5. Marital status?
  - ☐ Single
  - ☐ Married
  - ☐ Divorced
  - ☐ Widowed

6. Education level:

- ☐ Below primary education
- ☐ Primary education
- ☐ Secondary education
- ☐ Tertiary education or above

7. Employment status:

- ☐ Full-time employment (including self-employed)
- ☐ Part-time employment (including self-employed)
- ☐ Student
- ☐ Unable to work due to illness
- ☐ Homemaker
- ☐ Retired
- ☐ Currently job-seeking
- ☐ Unemployed
- ☐ Other

8. District of residence:

**Hong Kong Island**

- ☐ Central & Western    ☐ Eastern    ☐ Southern    ☐ Wan Chai

**Kowloon**

- ☐ Kowloon City    ☐ Kwun Tong    ☐ Sham Shui Po    ☐ Wong Tai Sin
- ☐ Yau Tsim Mong

**New Territories**

- ☐ Sha Tin    ☐ Tai Po    ☐ North    ☐ Yuen Long
- ☐ Tuen Mun    ☐ Sai Kung    ☐ Islands    ☐ Tsuen Wan
- ☐ Kwai Ching

9. Country/region of birth: \_\_\_\_\_

10. If you were born outside Hong Kong, when did you come to Hong Kong? (Skip if born in Hong Kong)

- ☐ Within 1 year
- ☐ 1–5 years ago
- ☐ 5–10 years ago
- ☐ 10–20 years ago
- ☐ More than 20 years ago

11. Do you have any chronic diseases?

- ☐ None
- ☐ One
- ☐ Two
- ☐ Three
- ☐ Four or above

## **Part 2: History of Hepatitis B Screening**

This section is to understand and collect information about your history of hepatitis B testing.

12. Do any of your family or friends have hepatitis B?
- ☐ Yes
  - ☐ No
  - ☐ Not sure
13. Do you have medical insurance? (Select all that apply)
- ☐ Personal/voluntary medical insurance
  - ☐ Employer-provided insurance
  - ☐ None
14. Do you have a regular family doctor/GP?
- ☐ Yes
  - ☐ No
15. When was your last doctor visit?
- ☐ Within 1 year
  - ☐ 1–5 years ago
  - ☐ 5–10 years ago
  - ☐ 10–20 years ago
  - ☐ More than 20 years ago
16. Has your doctor ever mentioned hepatitis B testing to you?
- ☐ Yes
  - ☐ No
  - ☐ Not sure
17. Free hepatitis B testing is available in some places. If offered, would you take the test?
- ☐ Willing
  - ☐ Not willing
  - ☐ Not sure

18. Some people choose not to take hepatitis B testing. Which of the following reasons apply to you? (Select all that apply)

- ☐ I have been vaccinated
- ☐ I don't know where to test
- ☐ I don't understand the benefits of testing
- ☐ I cannot afford the cost
- ☐ I don't want to know the result
- ☐ I feel healthy and don't think I have liver problems
- ☐ I don't need testing because I have no risk factors
- ☐ My family doctor/GP said I don't need testing
- ☐ Other: \_\_\_\_\_

19. Which is the main reason you would not test for hepatitis B? (Select one)

- ☐ I have been vaccinated
- ☐ I don't know where to test
- ☐ I don't understand the benefits of testing
- ☐ I cannot afford the cost
- ☐ I don't want to know the result
- ☐ I feel healthy and don't think I have liver problems
- ☐ I don't need testing because I have no risk factors
- ☐ My family doctor/GP said I don't need testing
- ☐ Other: \_\_\_\_\_

20. Have you received hepatitis B vaccination?

- ☐ Yes
- ☐ No
- ☐ Not sure

**If you have received the hepatitis B vaccine, please answer Questions 21–23**

**If you have not received the hepatitis B vaccine, please answer Question 24.**

**If you are unsure whether you have received the hepatitis B vaccine, please skip to Part III.**

21. If you have received the hepatitis B vaccine, when was it?

- ☐ Within 1 year
- ☐ 1–5 years ago
- ☐ 5–10 years ago
- ☐ 10–20 years ago
- ☐ More than 20 years ago

22. If you have received the hepatitis B vaccine, where was it given?

- ☐ Hong Kong
- ☐ Outside Hong Kong – in my place of birth
- ☐ Outside Hong Kong – not in my place of birth

23. If you have received the hepatitis B vaccine, what were the reasons? (Select all that apply)

- ☐ Recommended by family
- ☐ Recommended by friends
- ☐ Recommended by my doctor
- ☐ Attended a health talk or activity
- ☐ Part of infant, childhood, or school vaccination programme
- ☐ To protect myself from hepatitis B
- ☐ Other: \_\_\_\_\_

24. If you have not received the hepatitis B vaccine, why not? (Select all that apply)

- ☐ I don't know where to get the vaccine
- ☐ I don't understand the benefits of vaccination
- ☐ I am worried about side effects
- ☐ I cannot afford the vaccination cost
- ☐ I don't have time to get vaccinated
- ☐ I feel healthy and don't think I need it
- ☐ I don't need it because I have no risk factors for hepatitis B
- ☐ My family doctor/GP said I don't need it

### Part 3: Knowledge of Hepatitis B

This part assesses your understanding regarding transmission mode and disease knowledge about hepatitis B. Please indicate whether the following statements are True or False:

|                                                                                                             | True | False |
|-------------------------------------------------------------------------------------------------------------|------|-------|
| 25. Hepatitis B can be transmitted through sexual contact.                                                  |      |       |
| 26. Hepatitis B can be transmitted from mother to child during delivery.                                    |      |       |
| 27. Hepatitis B can be transmitted through genetic inheritance.                                             |      |       |
| 28. Hepatitis B can be transmitted through blood transfusion.                                               |      |       |
| 29. Hepatitis B can be transmitted through sharing needles.                                                 |      |       |
| 30. Hepatitis B can be transmitted through sharing razors or toothbrushes.                                  |      |       |
| 31. Hepatitis B can be transmitted through sharing food or utensils (such as bowls, chopsticks, or spoons). |      |       |
| 32. Hepatitis B can be transmitted through shaking hands.                                                   |      |       |
| 33. Hepatitis B can be transmitted by eating raw shellfish.                                                 |      |       |
| 34. Hepatitis B can be prevented.                                                                           |      |       |
| 35. Hepatitis B is curable.                                                                                 |      |       |
| 36. Hepatitis B virus can be killed through handwashing.                                                    |      |       |
| 37. Hepatitis B vaccine exists.                                                                             |      |       |
| 38. You may be infected with chronic hepatitis B without showing symptoms.                                  |      |       |
| 39. Chronic hepatitis B can cause liver cirrhosis (scarring caused by liver damage).                        |      |       |
| 40. Chronic hepatitis B can cause liver cancer.                                                             |      |       |

### **Part 4: Attitudes towards Hepatitis B**

This section is to assess your attitudes towards the diagnosis and treatment of hepatitis B. Please answer truthfully. For each question, please choose **'Yes'** or **'No'**.

|                                                                                          | Yes | No |
|------------------------------------------------------------------------------------------|-----|----|
| 41. If my doctor recommends hepatitis B testing, I will do it.                           |     |    |
| 42. If I know a family member or friend has hepatitis B, I am more likely to get tested. |     |    |
| 43. If I have hepatitis B, I will avoid close contact with others.                       |     |    |
| 44. If I have hepatitis B, I will feel ashamed for my family.                            |     |    |
| 45. If I have hepatitis B, I will feel embarrassed.                                      |     |    |
| 46. If I have hepatitis B, I will not have children.                                     |     |    |
| 47. If I have hepatitis B, I may lose my job.                                            |     |    |
| 48. If I test positive, I will seek treatment.                                           |     |    |
| 49. If free treatment is available, I will be more willing to test.                      |     |    |
| 50. If free vaccination is available, I will be more willing to test.                    |     |    |



### **Part 5: Satisfaction with Hepatitis B Point-of-Care Testing**

This section assesses your satisfaction with hepatitis B point-of-care testing. Please answer truthfully.

Please rate your agreement with the following statements (0 = strongly disagree, 10 = strongly agree).

51. I would rather have blood taken by a finger prick than by a needle in my arm.

|   |   |   |   |   |   |   |   |   |   |    |
|---|---|---|---|---|---|---|---|---|---|----|
|   |   |   |   |   |   |   |   |   |   |    |
| 0 | 1 | 2 | 3 | 4 | 5 | 6 | 7 | 8 | 9 | 10 |

Strongly Disagree

Strongly Agree

52. Laboratories have better hygiene than point-of-care testing.

|   |   |   |   |   |   |   |   |   |   |    |
|---|---|---|---|---|---|---|---|---|---|----|
|   |   |   |   |   |   |   |   |   |   |    |
| 0 | 1 | 2 | 3 | 4 | 5 | 6 | 7 | 8 | 9 | 10 |

Strongly Disagree

Strongly Agree

53. I have confidence in the information given by my healthcare provider regarding my test result.

|   |   |   |   |   |   |   |   |   |   |    |
|---|---|---|---|---|---|---|---|---|---|----|
|   |   |   |   |   |   |   |   |   |   |    |
| 0 | 1 | 2 | 3 | 4 | 5 | 6 | 7 | 8 | 9 | 10 |

Strongly Disagree

Strongly Agree

54. Not having to travel to an outside laboratory would be convenient.

|   |   |   |   |   |   |   |   |   |   |    |
|---|---|---|---|---|---|---|---|---|---|----|
|   |   |   |   |   |   |   |   |   |   |    |
| 0 | 1 | 2 | 3 | 4 | 5 | 6 | 7 | 8 | 9 | 10 |

Strongly Disagree

Strongly Agree

55. Outside laboratories involve extra time and transport costs.

|   |   |   |   |   |   |   |   |   |   |    |
|---|---|---|---|---|---|---|---|---|---|----|
|   |   |   |   |   |   |   |   |   |   |    |
| 0 | 1 | 2 | 3 | 4 | 5 | 6 | 7 | 8 | 9 | 10 |

Strongly Disagree

Strongly Agree

56. Having immediate feedback of the test result is important as it allows me to discuss management with my healthcare provider.

|   |   |   |   |   |   |   |   |   |   |    |
|---|---|---|---|---|---|---|---|---|---|----|
|   |   |   |   |   |   |   |   |   |   |    |
| 0 | 1 | 2 | 3 | 4 | 5 | 6 | 7 | 8 | 9 | 10 |

Strongly Disagree

Strongly Agree

57. Point-of-care testing would strengthen my relationship with my healthcare provider.

|   |   |   |   |   |   |   |   |   |   |    |
|---|---|---|---|---|---|---|---|---|---|----|
|   |   |   |   |   |   |   |   |   |   |    |
| 0 | 1 | 2 | 3 | 4 | 5 | 6 | 7 | 8 | 9 | 10 |

Strongly Disagree

Strongly Agree

--- End of Questionnaire ---

Thank you!
